# Supplementary material
Source: PubMed Central journal article supplement (PMC2834377)
Supplement: cin-2010-015s.pdf [file cin-2010-015s.pdf]

**1 The classification accuracy (%) in the other datasets based on  $\alpha$  depended degree.**

(The best classification accuracy achieved among the different classifiers under the identical  $\alpha$  value and gene number is shown in boldface.)

**CNS Tumor:**

| $\alpha$ | Gene number | NB           | DT           | SVM          | $k$ -NN      |
|----------|-------------|--------------|--------------|--------------|--------------|
| 100      | 100         | 65           | 71.67        | <b>81.67</b> | 70           |
|          | 50          | 65           | 76.67        | <b>81.67</b> | 75           |
|          | 20          | 81.67        | 85           | <b>91.67</b> | 75           |
|          | 10          | 83.33        | <b>85</b>    | 78.33        | 80           |
|          | 5           | 81.67        | <b>85</b>    | 63.33        | 73.33        |
|          | 2           | 75           | <b>80</b>    | 65           | 63.33        |
|          | 1           | <b>68.33</b> | 31.67        | 65           | 58.33        |
| 95       | 100         | 71.67        | 71.67        | <b>78.33</b> | 65           |
|          | 50          | 70           | 76.67        | <b>85</b>    | 73.33        |
|          | 20          | 78.33        | 80           | <b>88.33</b> | 75           |
|          | 10          | 80           | <b>81.67</b> | <b>81.67</b> | <b>81.67</b> |
|          | 5           | 76.67        | 76.67        | 65           | <b>85</b>    |
|          | 2           | 71.67        | 75           | 65           | <b>76.67</b> |
|          | 1           | 58.33        | <b>71.67</b> | 65           | 66.67        |
| 90       | 100         | 70           | 66.67        | <b>76.67</b> | 66.67        |
|          | 50          | 73.33        | 70           | <b>86.67</b> | 78.33        |
|          | 20          | 76.67        | 73.33        | <b>83.33</b> | 80           |
|          | 10          | 75           | 76.67        | 71.67        | <b>85</b>    |
|          | 5           | 70           | 73.33        | 65           | <b>78.33</b> |
|          | 2           | 68.33        | 61.67        | 65           | <b>75</b>    |
|          | 1           | 61.67        | <b>71.67</b> | 65           | 68.33        |
| 85       | 100         | 75           | 63.33        | <b>86.67</b> | 68.33        |
|          | 50          | 76.67        | 68.33        | <b>88.33</b> | 78.33        |
|          | 20          | 76.67        | 68.33        | <b>80</b>    | 78.33        |
|          | 10          | <b>75</b>    | 70           | 71.67        | 73.33        |
|          | 5           | 70           | 66.67        | 63.33        | <b>78.33</b> |
|          | 2           | 65           | 58.33        | 65           | <b>71.67</b> |
|          | 1           | 65           | 65           | 65           | <b>78.33</b> |
| 80       | 100         | 75           | 63.33        | <b>90</b>    | 73.33        |

|    |     |              |              |              |              |
|----|-----|--------------|--------------|--------------|--------------|
|    | 50  | 75           | 73.33        | <b>90</b>    | 78.33        |
|    | 20  | <b>76.67</b> | 71.67        | <b>76.67</b> | 75           |
|    | 10  | <b>81.67</b> | 71.67        | 73.33        | <b>81.67</b> |
|    | 5   | 71.67        | <b>83.33</b> | 65           | 76.67        |
|    | 2   | 65           | 75           | 65           | <b>80</b>    |
|    | 1   | 56.67        | 81.67        | 65           | <b>83.33</b> |
| 75 | 100 | 75           | 61.67        | <b>88.33</b> | 73.33        |
|    | 50  | 75           | 70           | <b>88.33</b> | 75           |
|    | 20  | 75           | 65           | 75           | <b>78.33</b> |
|    | 10  | 68.33        | 71.67        | <b>75</b>    | <b>75</b>    |
|    | 5   | 73.33        | 75           | 65           | <b>81.67</b> |
|    | 2   | 65           | <b>81.67</b> | 65           | 76.67        |
|    | 1   | 70           | <b>75</b>    | 65           | <b>75</b>    |
| 70 | 100 | 75           | 66.67        | <b>88.33</b> | 73.33        |
|    | 50  | 71.67        | 68.33        | <b>78.33</b> | <b>78.33</b> |
|    | 20  | 61.67        | <b>76.67</b> | 75           | 73.33        |
|    | 10  | 60           | <b>76.67</b> | 65           | <b>76.67</b> |
|    | 5   | 60           | <b>71.67</b> | 65           | <b>71.67</b> |
|    | 2   | 65           | 65           | 65           | <b>68.33</b> |
|    | 1   | 53.33        | <b>73.33</b> | 65           | 63.33        |

**DLBCL:**

| $\alpha$ | Gene number | NB           | DT           | SVM          | $k$ -NN      |
|----------|-------------|--------------|--------------|--------------|--------------|
| 100      | 100         | <b>74.14</b> | 63.79        | 72.41        | 63.79        |
|          | 50          | <b>84.48</b> | 70.69        | 81.03        | 70.69        |
|          | 20          | 77.59        | 77.59        | <b>81.03</b> | <b>81.03</b> |
|          | 10          | <b>74.14</b> | 67.24        | 72.41        | 62.07        |
|          | 5           | <b>65.52</b> | 63.79        | 50           | 56.90        |
|          | 2           | 62.07        | <b>72.41</b> | 53.45        | 65.52        |
|          | 1           | 70.69        | 70.69        | 55.17        | <b>75.86</b> |
| 95       | 100         | <b>74.14</b> | 63.79        | 72.41        | 63.79        |
|          | 50          | <b>84.48</b> | 70.69        | 81.03        | 70.69        |
|          | 20          | 77.59        | 77.59        | <b>81.03</b> | <b>81.03</b> |
|          | 10          | <b>74.14</b> | 67.24        | 72.41        | 62.07        |
|          | 5           | <b>65.52</b> | 63.79        | 50           | 56.90        |

|    |     |              |              |              |              |
|----|-----|--------------|--------------|--------------|--------------|
|    | 2   | 62.07        | <b>72.41</b> | 53.45        | 65.52        |
|    | 1   | 70.69        | 70.69        | 55.17        | <b>75.86</b> |
| 90 | 100 | <b>75.86</b> | 60.34        | <b>75.86</b> | 72.41        |
|    | 50  | <b>81.03</b> | 63.79        | <b>81.03</b> | <b>81.03</b> |
|    | 20  | <b>82.76</b> | 72.41        | 75.86        | 75.86        |
|    | 10  | 77.59        | 60.34        | <b>79.31</b> | 74.14        |
|    | 5   | 60.34        | 58.62        | <b>77.59</b> | 72.41        |
|    | 2   | 62.07        | <b>74.14</b> | 58.62        | 56.90        |
|    | 1   | 70.69        | 70.69        | 55.17        | <b>75.86</b> |
| 85 | 100 | <b>75.86</b> | 48.28        | <b>75.86</b> | 72.41        |
|    | 50  | <b>82.76</b> | 53.45        | 81.03        | 79.31        |
|    | 20  | 81.03        | 53.45        | 79.31        | <b>82.76</b> |
|    | 10  | <b>77.59</b> | 60.34        | 72.41        | 65.52        |
|    | 5   | <b>70.69</b> | 60.34        | 55.17        | 65.52        |
|    | 2   | 67.24        | <b>75.86</b> | 53.45        | 72.41        |
|    | 1   | 67.24        | <b>79.31</b> | 55.17        | 70.69        |
| 80 | 100 | <b>79.31</b> | 53.45        | 72.41        | 72.41        |
|    | 50  | 79.31        | 56.90        | <b>84.48</b> | <b>84.48</b> |
|    | 20  | 77.59        | 60.34        | <b>81.03</b> | 79.31        |
|    | 10  | 62.07        | <b>65.52</b> | <b>65.52</b> | 63.79        |
|    | 5   | 67.24        | <b>79.31</b> | 65.52        | 62.07        |
|    | 2   | 63.79        | 63.79        | 58.62        | <b>74.14</b> |
|    | 1   | 63.79        | 55.17        | <b>72.41</b> | 67.24        |
| 75 | 100 | <b>79.31</b> | 53.45        | 72.41        | 72.41        |
|    | 50  | 77.59        | 58.62        | <b>81.03</b> | 79.31        |
|    | 20  | 77.59        | 58.62        | <b>81.03</b> | 79.31        |
|    | 10  | 67.24        | 55.17        | <b>70.69</b> | 56.90        |
|    | 5   | 67.24        | 63.79        | 65.52        | <b>70.69</b> |
|    | 2   | 67.24        | <b>72.41</b> | 53.45        | 67.24        |
|    | 1   | 58.62        | <b>75.86</b> | 55.17        | <b>75.86</b> |
| 70 | 100 | <b>79.31</b> | 53.45        | 72.41        | 72.41        |
|    | 50  | 77.59        | 58.62        | <b>81.03</b> | 79.31        |
|    | 20  | 77.59        | 58.62        | <b>81.03</b> | 79.31        |
|    | 10  | 67.24        | 67.24        | 75.86        | <b>77.59</b> |
|    | 5   | 65.52        | <b>84.48</b> | 58.62        | 72.41        |

|  |   |       |              |       |              |
|--|---|-------|--------------|-------|--------------|
|  | 2 | 58.62 | 67.24        | 55.17 | <b>77.59</b> |
|  | 1 | 55.17 | <b>74.14</b> | 55.17 | 70.69        |

**Leukemia 1:**

| $\alpha$ | Gene number | NB           | DT           | SVM          | $k$ -NN      |
|----------|-------------|--------------|--------------|--------------|--------------|
| 100      | 100         | <b>100</b>   | 87.5         | 94.44        | 97.22        |
|          | 50          | <b>98.61</b> | 94.44        | 97.22        | 95.83        |
|          | 20          | <b>97.22</b> | 95.83        | 93.06        | 95.83        |
|          | 10          | <b>95.83</b> | 93.06        | 94.44        | 94.44        |
|          | 5           | <b>94.44</b> | 93.06        | 93.06        | 93.06        |
|          | 2           | 87.5         | 87.5         | 90.28        | <b>91.67</b> |
|          | 1           | 83.33        | <b>86.11</b> | 80.56        | 81.94        |
| 95       | 100         | <b>98.61</b> | 80.56        | 97.22        | 97.22        |
|          | 50          | <b>98.61</b> | 81.94        | 95.83        | 95.83        |
|          | 20          | <b>97.22</b> | 81.94        | <b>97.22</b> | 93.06        |
|          | 10          | <b>95.83</b> | 84.72        | <b>95.83</b> | 94.44        |
|          | 5           | <b>98.61</b> | 87.5         | 93.06        | 97.22        |
|          | 2           | 94.44        | <b>95.83</b> | 83.33        | <b>95.83</b> |
|          | 1           | 91.67        | <b>93.06</b> | 81.94        | <b>93.06</b> |
| 90       | 100         | <b>98.61</b> | 80.56        | <b>98.61</b> | 97.22        |
|          | 50          | 95.83        | 80.56        | <b>98.61</b> | 95.83        |
|          | 20          | 95.83        | 86.11        | <b>97.22</b> | <b>97.22</b> |
|          | 10          | <b>97.22</b> | 86.11        | 93.06        | 95.83        |
|          | 5           | <b>95.83</b> | 91.67        | 91.67        | 94.44        |
|          | 2           | <b>97.22</b> | 87.5         | 86.11        | 95.83        |
|          | 1           | 91.67        | <b>93.06</b> | 76.39        | <b>93.06</b> |
| 85       | 100         | 95.83        | 80.56        | 97.22        | <b>98.61</b> |
|          | 50          | 95.83        | 81.94        | 97.22        | <b>98.61</b> |
|          | 20          | <b>95.83</b> | 83.33        | 93.06        | 94.44        |
|          | 10          | <b>97.22</b> | 87.5         | 93.06        | 94.44        |
|          | 5           | <b>98.61</b> | 86.11        | 90.28        | 95.83        |
|          | 2           | 91.67        | <b>93.06</b> | 75           | 91.67        |
|          | 1           | 91.67        | <b>93.06</b> | 76.39        | <b>93.06</b> |
| 80       | 100         | 95.83        | 81.94        | 95.83        | <b>97.22</b> |
|          | 50          | 95.83        | 80.56        | <b>97.22</b> | 93.06        |

|    |     |              |              |              |              |
|----|-----|--------------|--------------|--------------|--------------|
|    | 20  | <b>95.83</b> | 87.5         | <b>95.83</b> | 94.44        |
|    | 10  | 91.67        | 91.67        | <b>95.83</b> | 91.67        |
|    | 5   | 88.89        | <b>91.67</b> | 84.72        | 83.33        |
|    | 2   | <b>81.94</b> | 73.61        | 76.39        | 79.17        |
|    | 1   | 77.78        | <b>81.94</b> | 72.22        | 79.17        |
| 75 | 100 | 94.44        | 86.11        | <b>95.83</b> | 91.67        |
|    | 50  | <b>94.44</b> | 87.5         | 93.06        | 90.28        |
|    | 20  | 88.89        | 81.94        | <b>93.06</b> | 87.5         |
|    | 10  | <b>84.72</b> | <b>84.72</b> | <b>84.72</b> | 83.33        |
|    | 5   | <b>84.72</b> | 79.17        | 77.78        | 73.61        |
|    | 2   | 79.17        | <b>80.56</b> | 73.61        | 77.78        |
|    | 1   | 72.22        | <b>73.61</b> | 65.28        | 72.22        |
| 70 | 100 | 95.83        | 93.06        | <b>98.61</b> | 88.89        |
|    | 50  | 97.22        | 93.06        | <b>98.61</b> | 91.67        |
|    | 20  | <b>90.28</b> | 80.56        | 87.5         | 87.5         |
|    | 10  | <b>81.94</b> | 77.78        | 80.56        | 79.17        |
|    | 5   | 76.39        | 76.39        | <b>77.78</b> | 76.39        |
|    | 2   | 70.83        | <b>73.61</b> | 65.28        | <b>73.61</b> |
|    | 1   | 72.22        | <b>73.61</b> | 65.28        | 72.22        |

**Lung Cancer:**

| $\alpha$ | Gene number | NB           | DT    | SVM          | $k$ -NN      |
|----------|-------------|--------------|-------|--------------|--------------|
| 100      | 100         | <b>99.45</b> | 96.69 | <b>99.45</b> | 98.34        |
|          | 50          | 98.90        | 96.13 | <b>99.45</b> | <b>99.45</b> |
|          | 20          | <b>99.45</b> | 96.69 | 98.90        | 98.90        |
|          | 10          | 98.34        | 97.79 | <b>99.45</b> | 98.90        |
|          | 5           | <b>98.90</b> | 92.82 | 97.24        | 97.79        |
|          | 2           | <b>95.58</b> | 93.37 | 82.87        | 94.48        |
|          | 1           | 92.82        | 92.82 | 82.87        | <b>93.37</b> |
| 95       | 100         | <b>100</b>   | 97.24 | 99.45        | 98.90        |
|          | 50          | <b>100</b>   | 97.24 | 98.90        | 98.34        |
|          | 20          | <b>99.45</b> | 97.79 | 98.90        | 98.34        |
|          | 10          | <b>99.45</b> | 96.13 | 98.90        | 98.90        |
|          | 5           | <b>99.45</b> | 96.69 | 97.79        | 97.79        |
|          | 2           | <b>97.79</b> | 96.69 | 93.92        | <b>97.79</b> |

|    |     |              |              |              |              |
|----|-----|--------------|--------------|--------------|--------------|
|    | 1   | <b>97.24</b> | 96.69        | 86.74        | 96.69        |
| 90 | 100 | 98.34        | 97.79        | <b>98.90</b> | 98.34        |
|    | 50  | 96.69        | 98.35        | <b>98.90</b> | 97.79        |
|    | 20  | <b>98.90</b> | 91.71        | 98.34        | 98.34        |
|    | 10  | 97.79        | 96.13        | <b>98.34</b> | 97.24        |
|    | 5   | <b>98.34</b> | 97.24        | 97.24        | 97.79        |
|    | 2   | 97.24        | 97.24        | 90.06        | <b>97.79</b> |
|    | 1   | 91.16        | <b>91.71</b> | 84.53        | 88.95        |
| 85 | 100 | 95.58        | 95.58        | <b>96.69</b> | 91.71        |
|    | 50  | <b>96.13</b> | 93.37        | 95.03        | 90.61        |
|    | 20  | 92.27        | <b>94.48</b> | 88.40        | 88.40        |
|    | 10  | <b>88.40</b> | 82.87        | 86.74        | 84.53        |
|    | 5   | <b>86.74</b> | 85.64        | 82.87        | 85.08        |
|    | 2   | 83.43        | 83.43        | 82.87        | <b>84.53</b> |
|    | 1   | 81.77        | <b>83.98</b> | 82.87        | 82.32        |
| 80 | 100 | 86.19        | 80.11        | <b>92.27</b> | 85.64        |
|    | 50  | 85.64        | 79.01        | <b>87.85</b> | 83.98        |
|    | 20  | 85.64        | 79.01        | <b>87.85</b> | 83.98        |
|    | 10  | 79.01        | 80.11        | <b>82.87</b> | 81.77        |
|    | 5   | 80.66        | 80.66        | 82.87        | <b>83.98</b> |
|    | 2   | 82.32        | 80.66        | 82.87        | <b>83.43</b> |
|    | 1   | <b>83.43</b> | 82.87        | 82.87        | 80.66        |
| 75 | 100 | 89.50        | 89.50        | <b>94.48</b> | 87.29        |
|    | 50  | 88.95        | 85.64        | <b>90.06</b> | 87.29        |
|    | 20  | 85.64        | 79.01        | <b>87.85</b> | 83.98        |
|    | 10  | 79.01        | 80.11        | <b>82.87</b> | 81.77        |
|    | 5   | 80.66        | 80.66        | 82.87        | <b>83.98</b> |
|    | 2   | 82.32        | 80.66        | 82.87        | <b>83.43</b> |
|    | 1   | <b>83.43</b> | 82.87        | 82.87        | 80.66        |
| 70 | 100 | 90.6077      | <b>96.13</b> | 95.58        | 88.95        |
|    | 50  | 91.1602      | 89.50        | <b>93.92</b> | 87.29        |
|    | 20  | 77.9006      | 81.77        | <b>83.98</b> | 80.66        |
|    | 10  | 80.1105      | <b>82.32</b> | <b>82.32</b> | 81.22        |
|    | 5   | 80.663       | 80.66        | 82.87        | <b>83.98</b> |
|    | 2   | 82.3204      | 80.66        | 82.87        | <b>83.43</b> |

|  |   |                |       |       |       |
|--|---|----------------|-------|-------|-------|
|  | 1 | <b>83.4254</b> | 82.87 | 82.87 | 80.66 |
|--|---|----------------|-------|-------|-------|

**Prostate Cancer:**

| $\alpha$ | Gene number | NB           | DT           | SVM          | k-NN         |
|----------|-------------|--------------|--------------|--------------|--------------|
| 100      | 100         | 90.20        | 88.24        | <b>93.14</b> | 91.18        |
|          | 50          | 91.18        | 87.25        | <b>94.12</b> | 91.18        |
|          | 20          | 90.20        | 88.24        | <b>94.12</b> | 89.22        |
|          | 10          | 91.18        | 90.20        | <b>94.12</b> | 90.20        |
|          | 5           | 91.18        | 90.20        | <b>92.16</b> | 89.22        |
|          | 2           | 88.24        | <b>92.16</b> | 86.27        | 90.20        |
|          | 1           | 84.31        | <b>88.24</b> | 82.35        | 87.25        |
| 95       | 100         | 91.18        | 89.22        | <b>94.12</b> | 91.18        |
|          | 50          | 92.16        | 92.16        | <b>98.04</b> | 92.16        |
|          | 20          | 95.10        | 91.18        | <b>96.08</b> | 94.12        |
|          | 10          | <b>95.10</b> | 90.20        | <b>95.10</b> | 92.16        |
|          | 5           | 92.16        | 88.24        | 92.16        | <b>94.12</b> |
|          | 2           | <b>92.16</b> | 89.22        | 90.20        | 91.18        |
|          | 1           | 84.31        | <b>88.24</b> | 82.35        | 87.25        |
| 90       | 100         | 93.14        | 88.24        | 92.16        | <b>94.14</b> |
|          | 50          | <b>94.12</b> | 89.22        | 93.14        | 93.14        |
|          | 20          | 94.12        | 86.27        | <b>95.10</b> | 93.14        |
|          | 10          | <b>94.12</b> | 85.29        | <b>94.12</b> | 91.18        |
|          | 5           | 92.16        | 85.29        | <b>93.14</b> | <b>93.14</b> |
|          | 2           | <b>90.20</b> | 88.24        | <b>90.20</b> | 88.23        |
|          | 1           | 84.31        | <b>88.24</b> | 82.35        | 87.25        |
| 85       | 100         | 91.18        | 93.14        | <b>96.08</b> | 94.11        |
|          | 50          | 91.18        | 79.41        | <b>94.12</b> | 93.14        |
|          | 20          | 92.16        | 84.31        | <b>93.14</b> | <b>93.14</b> |
|          | 10          | 91.18        | 85.29        | <b>92.16</b> | <b>92.16</b> |
|          | 5           | <b>92.16</b> | 87.25        | 90.20        | 91.18        |
|          | 2           | <b>92.16</b> | 89.22        | 90.20        | 91.18        |
|          | 1           | 87.25        | <b>89.22</b> | 68.63        | 86.27        |
| 80       | 100         | 91.18        | 87.25        | <b>94.12</b> | 92.16        |
|          | 50          | 89.22        | 85.29        | <b>93.14</b> | 92.16        |
|          | 20          | 92.16        | 91.18        | <b>95.10</b> | 94.12        |

|    |     |              |              |              |              |
|----|-----|--------------|--------------|--------------|--------------|
|    | 10  | 89.22        | 86.27        | <b>91.18</b> | 88.24        |
|    | 5   | 85.29        | 79.41        | 79.41        | <b>89.22</b> |
|    | 2   | 78.43        | 79.41        | 65.69        | <b>81.37</b> |
|    | 1   | 74.51        | <b>80.39</b> | 64.71        | 72.55        |
| 75 | 100 | 91.18        | 82.35        | 91.18        | <b>93.14</b> |
|    | 50  | 88.24        | 83.33        | 91.18        | <b>92.16</b> |
|    | 20  | <b>89.22</b> | 80.39        | <b>89.22</b> | <b>89.22</b> |
|    | 10  | 89.22        | 78.43        | 88.24        | <b>90.20</b> |
|    | 5   | <b>86.27</b> | 80.39        | 82.35        | 81.37        |
|    | 2   | 80.39        | <b>84.31</b> | 80.39        | 81.37        |
|    | 1   | 78.43        | 80.39        | 78.43        | <b>81.37</b> |
| 70 | 100 | 89.22        | 82.35        | <b>92.16</b> | <b>92.16</b> |
|    | 50  | 86.27        | 77.45        | <b>92.16</b> | 88.24        |
|    | 20  | 84.31        | 85.29        | <b>88.24</b> | 86.27        |
|    | 10  | 78.43        | <b>84.31</b> | 81.37        | <b>84.31</b> |
|    | 5   | 78.43        | 86.27        | 80.39        | <b>87.25</b> |
|    | 2   | 76.47        | <b>82.35</b> | 75.49        | 72.55        |
|    | 1   | 78.43        | 80.39        | 78.43        | <b>81.37</b> |

**Breast Cancer:**

| $\alpha$ | Gene number | NB    | DT           | SVM          | $k$ -NN      |
|----------|-------------|-------|--------------|--------------|--------------|
| 100      | 100         | 57.69 | 74.36        | 65.38        | 73.08        |
|          | 50          | 56.41 | <b>82.05</b> | 73.08        | 75.64        |
|          | 20          | 56.41 | <b>79.49</b> | 76.92        | 73.08        |
|          | 10          | 57.69 | <b>85.90</b> | 73.08        | 70.51        |
|          | 5           | 57.69 | <b>79.49</b> | 65.38        | 66.67        |
|          | 2           | 56.41 | <b>76.92</b> | 57.69        | 71.79        |
|          | 1           | 55.13 | <b>65.38</b> | 56.41        | 62.82        |
| 95       | 100         | 57.69 | 64.10        | 66.67        | <b>74.36</b> |
|          | 50          | 55.13 | 60.26        | <b>78.21</b> | 75.64        |
|          | 20          | 55.13 | 73.08        | 64.10        | <b>75.64</b> |
|          | 10          | 56.41 | <b>83.33</b> | 65.39        | 76.92        |
|          | 5           | 56.41 | <b>84.62</b> | 53.85        | 64.10        |
|          | 2           | 56.41 | <b>76.92</b> | 56.41        | 67.95        |
|          | 1           | 56.41 | 42.31        | 57.69        | <b>78.21</b> |



|    |     |              |              |              |              |
|----|-----|--------------|--------------|--------------|--------------|
| 90 | 100 | 57.69        | 62.82        | 66.67        | <b>71.79</b> |
|    | 50  | 57.69        | 65.39        | 73.08        | <b>76.92</b> |
|    | 20  | 57.69        | <b>79.49</b> | 70.51        | 75.64        |
|    | 10  | 58.97        | <b>82.05</b> | 62.82        | 73.08        |
|    | 5   | 60.26        | <b>82.05</b> | 71.79        | 79.49        |
|    | 2   | 56.41        | <b>74.36</b> | 56.41        | 65.38        |
|    | 1   | 66.67        | <b>74.36</b> | 55.13        | 70.51        |
| 85 | 100 | 57.69        | <b>76.92</b> | 65.38        | 69.23        |
|    | 50  | 56.41        | <b>85.90</b> | 73.08        | 71.79        |
|    | 20  | 58.97        | <b>80.77</b> | 75.64        | 78.21        |
|    | 10  | 62.82        | 79.49        | 75.64        | <b>84.62</b> |
|    | 5   | 66.67        | <b>84.62</b> | 66.67        | 78.21        |
|    | 2   | 56.41        | <b>74.36</b> | 56.41        | 65.38        |
|    | 1   | 66.67        | <b>74.36</b> | 55.13        | 70.51        |
| 80 | 100 | 55.13        | 71.79        | 74.36        | <b>75.64</b> |
|    | 50  | 56.41        | <b>78.21</b> | 76.92        | <b>78.21</b> |
|    | 20  | 57.69        | <b>78.21</b> | 74.36        | 75.64        |
|    | 10  | 58.97        | <b>85.90</b> | 73.08        | 71.79        |
|    | 5   | 60.26        | <b>75.64</b> | 74.36        | 71.79        |
|    | 2   | 57.69        | 76.92        | 57.69        | <b>82.05</b> |
|    | 1   | 56.41        | 71.79        | 57.69        | <b>76.92</b> |
| 75 | 100 | 55.13        | 66.67        | 75.64        | <b>76.92</b> |
|    | 50  | 55.13        | 55.13        | 78.21        | <b>83.33</b> |
|    | 20  | 61.54        | 71.79        | 71.79        | <b>75.64</b> |
|    | 10  | 61.54        | 65.38        | 76.92        | <b>78.21</b> |
|    | 5   | 64.10        | 65.38        | <b>79.49</b> | 75.64        |
|    | 2   | 73.08        | <b>79.49</b> | 66.67        | 70.51        |
|    | 1   | 71.79        | <b>73.08</b> | 65.38        | 71.79        |
| 70 | 100 | 57.69        | 66.67        | 79.49        | <b>80.77</b> |
|    | 50  | 64.10        | 64.10        | 76.92        | <b>80.77</b> |
|    | 20  | 69.23        | 51.28        | 67.95        | <b>75.64</b> |
|    | 10  | 67.95        | 58.97        | 71.79        | <b>78.21</b> |
|    | 5   | <b>71.79</b> | 53.85        | <b>71.79</b> | 70.51        |
|    | 2   | <b>69.23</b> | 58.97        | 67.95        | 60.26        |
|    | 1   | <b>71.79</b> | <b>71.79</b> | 69.23        | <b>71.79</b> |

Leukemia 2:

| $\alpha$ | Gene number | NB           | DT           | SVM          | k-NN         |
|----------|-------------|--------------|--------------|--------------|--------------|
| 100      | 100         | 91.23        | 78.95        | <b>94.74</b> | 89.47        |
|          | 50          | <b>96.49</b> | 80.70        | <b>96.49</b> | 91.23        |
|          | 20          | <b>96.49</b> | 82.46        | <b>96.49</b> | 94.74        |
|          | 10          | <b>94.74</b> | 87.72        | 89.47        | 87.72        |
|          | 5           | <b>89.47</b> | 84.21        | 82.46        | 85.96        |
|          | 2           | 82.46        | 82.46        | 61.40        | <b>84.21</b> |
|          | 1           | 82.46        | <b>85.96</b> | 61.40        | <b>85.96</b> |
| 95       | 100         | 92.98        | 75.44        | <b>94.74</b> | 92.98        |
|          | 50          | 94.74        | 77.19        | <b>96.49</b> | 91.23        |
|          | 20          | 92.98        | 80.70        | <b>96.49</b> | 92.98        |
|          | 10          | 94.74        | 80.70        | <b>96.49</b> | 92.98        |
|          | 5           | <b>89.47</b> | 84.21        | 82.46        | 85.96        |
|          | 2           | 82.46        | 82.46        | 61.40        | <b>84.21</b> |
|          | 1           | 82.46        | <b>85.96</b> | 61.40        | <b>85.96</b> |
| 90       | 100         | 94.74        | 73.68        | <b>96.49</b> | 91.23        |
|          | 50          | <b>94.74</b> | 80.70        | <b>94.74</b> | 84.21        |
|          | 20          | <b>98.25</b> | 84.21        | 96.49        | 85.96        |
|          | 10          | <b>94.74</b> | 89.47        | 80.70        | 85.96        |
|          | 5           | <b>94.74</b> | 89.47        | 70.18        | <b>94.74</b> |
|          | 2           | 84.21        | 78.95        | 68.42        | <b>85.96</b> |
|          | 1           | 85.97        | <b>89.47</b> | 52.63        | 85.96        |
| 85       | 100         | 89.47        | 85.97        | <b>94.74</b> | 91.23        |
|          | 50          | <b>92.98</b> | 78.95        | <b>92.98</b> | 91.23        |
|          | 20          | <b>94.74</b> | 71.93        | 89.47        | 85.96        |
|          | 10          | <b>84.21</b> | 80.70        | 82.46        | 82.46        |
|          | 5           | <b>82.46</b> | <b>82.46</b> | <b>82.46</b> | 78.95        |
|          | 2           | 80.70        | <b>89.47</b> | 63.16        | 84.21        |
|          | 1           | 85.96        | <b>89.47</b> | 52.63        | 85.96        |
| 80       | 100         | <b>96.49</b> | 70.18        | <b>96.49</b> | 91.23        |
|          | 50          | <b>96.49</b> | 80.70        | 91.23        | 89.47        |
|          | 20          | <b>91.23</b> | 80.70        | 84.21        | 84.21        |
|          | 10          | 84.21        | 78.95        | 84.21        | <b>87.72</b> |

|    |     |              |              |              |              |
|----|-----|--------------|--------------|--------------|--------------|
|    | 5   | 85.96        | 78.95        | 82.46        | <b>91.23</b> |
|    | 2   | 85.96        | <b>89.47</b> | 75.44        | 85.96        |
|    | 1   | 85.96        | <b>89.47</b> | 52.63        | 85.96        |
| 75 | 100 | <b>94.74</b> | 75.44        | <b>94.74</b> | 87.72        |
|    | 50  | <b>94.74</b> | 82.46        | 87.72        | 89.47        |
|    | 20  | <b>94.74</b> | 82.46        | 92.98        | 91.23        |
|    | 10  | <b>91.23</b> | 80.70        | 87.72        | 89.47        |
|    | 5   | <b>92.98</b> | 73.68        | 85.96        | 89.47        |
|    | 2   | 84.21        | 84.21        | 56.14        | <b>91.23</b> |
|    | 1   | 64.91        | <b>77.19</b> | 35.09        | <b>77.19</b> |
| 70 | 100 | <b>92.98</b> | 82.46        | <b>92.98</b> | 84.21        |
|    | 50  | <b>94.74</b> | 82.46        | 91.23        | 89.47        |
|    | 20  | <b>96.49</b> | 77.19        | 91.23        | 91.23        |
|    | 10  | <b>91.23</b> | 73.68        | 85.96        | <b>91.23</b> |
|    | 5   | <b>84.21</b> | 73.68        | 82.46        | <b>84.21</b> |
|    | 2   | 64.91        | <b>75.44</b> | 47.37        | <b>75.44</b> |
|    | 1   | 57.89        | <b>66.67</b> | 42.11        | 56.14        |

2 Average classification accuracy for different  $\alpha$  values in the other seven datasets.

Fig. S1

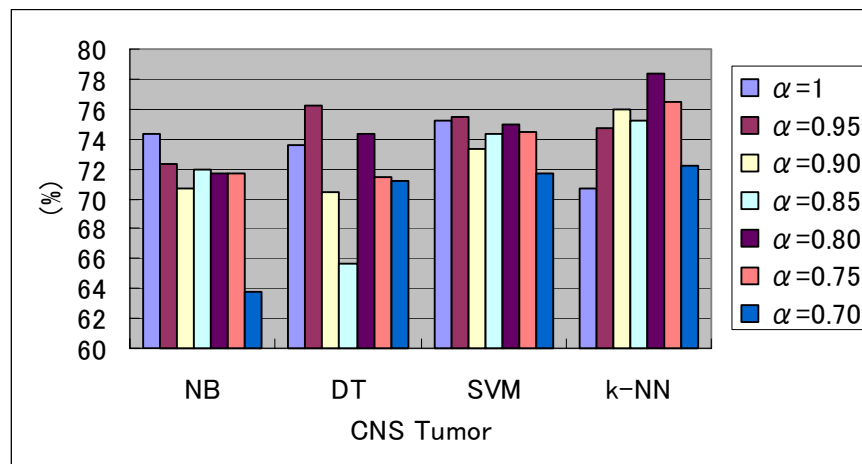

Fig. S2

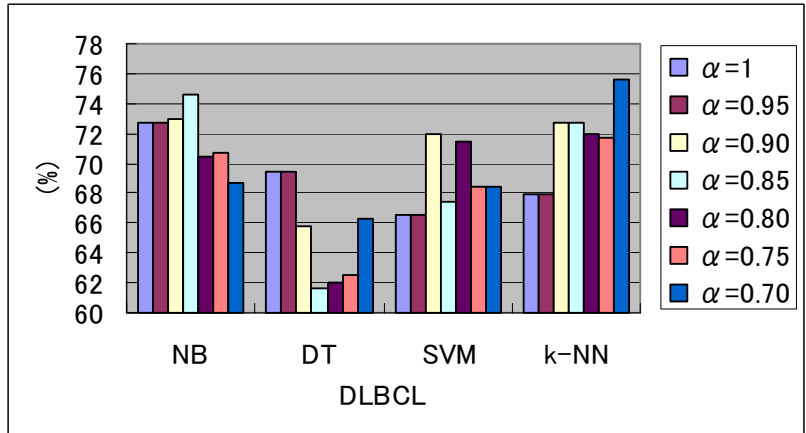

Fig. S3

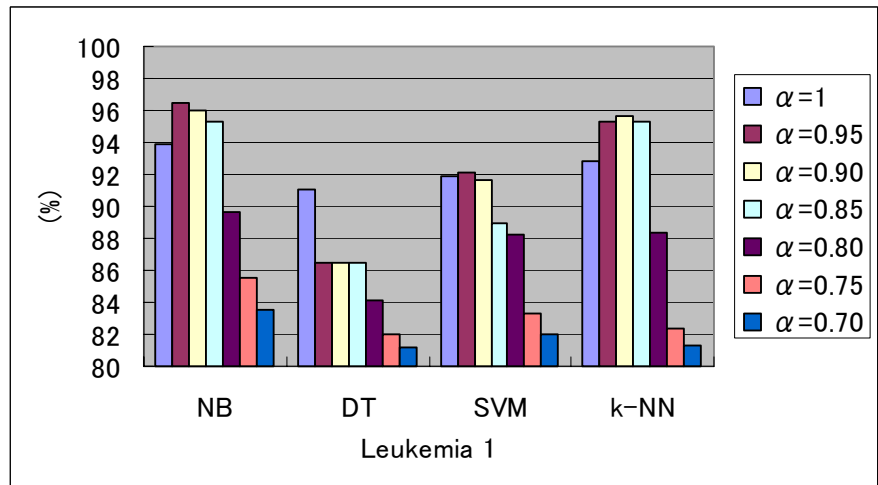

Fig. S4

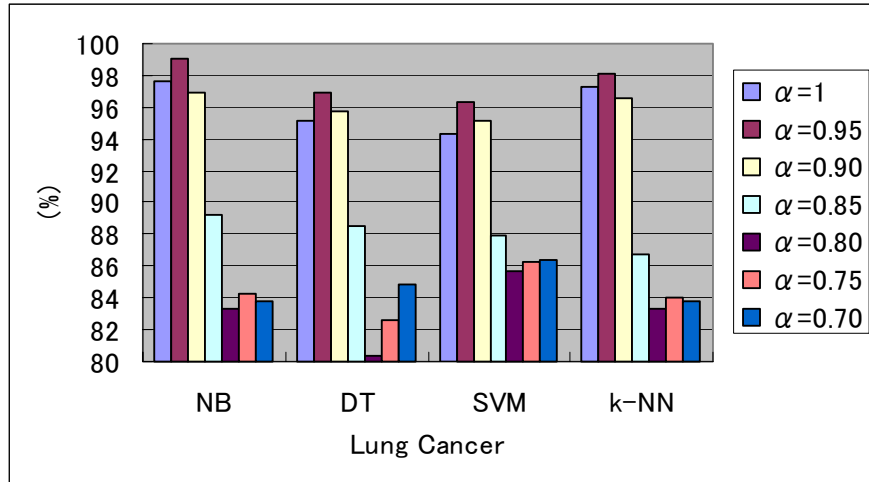

Fig. S5

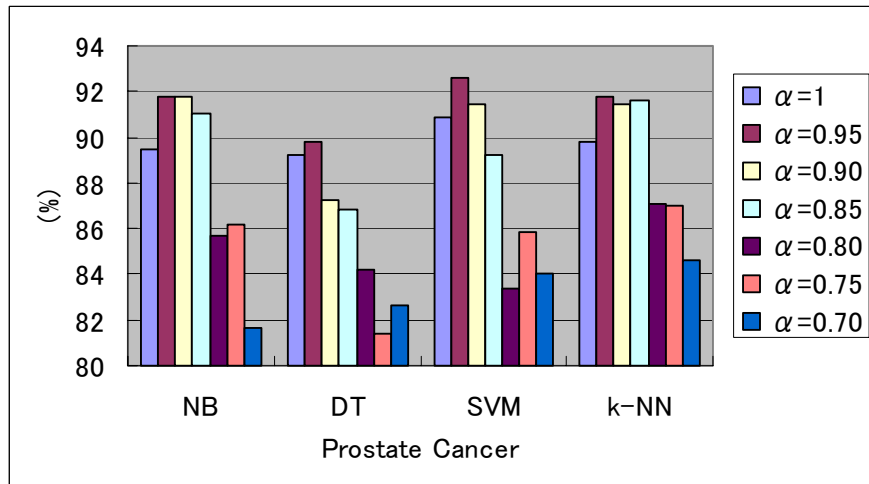

Fig. S6

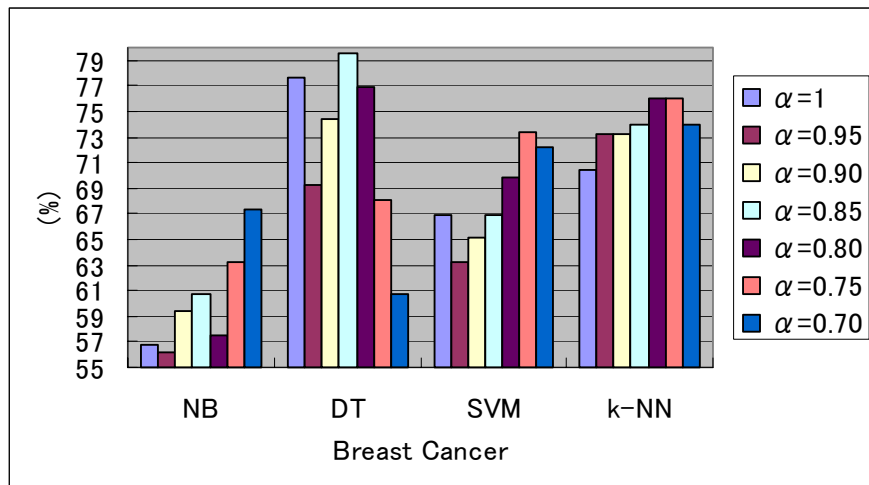

Fig. S7

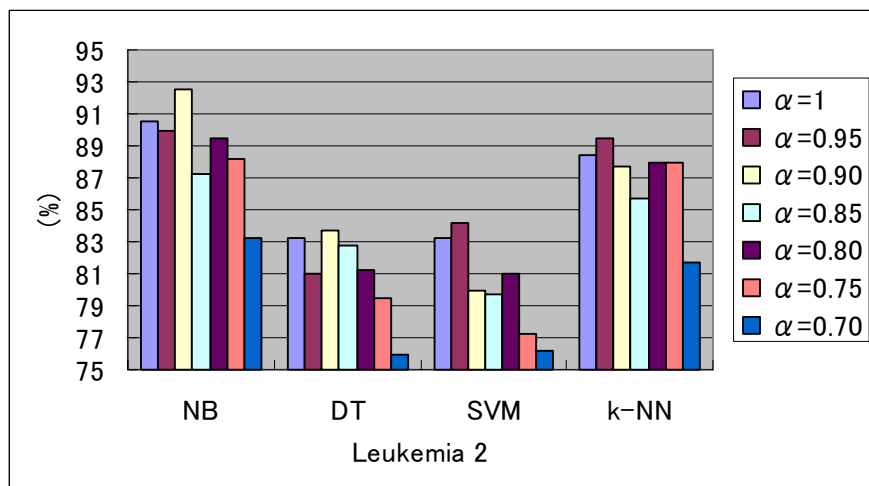

3 Best classification accuracy for different  $\alpha$  values in the other seven datasets.

Fig. S8

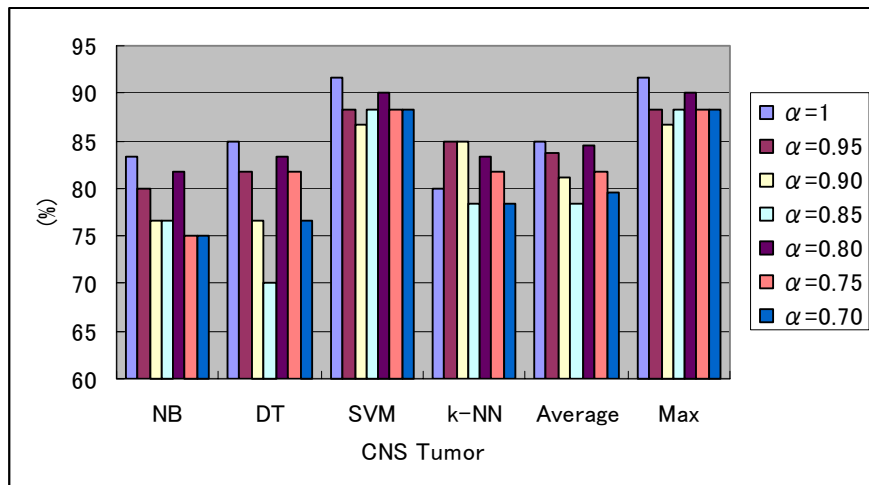

Fig. S9

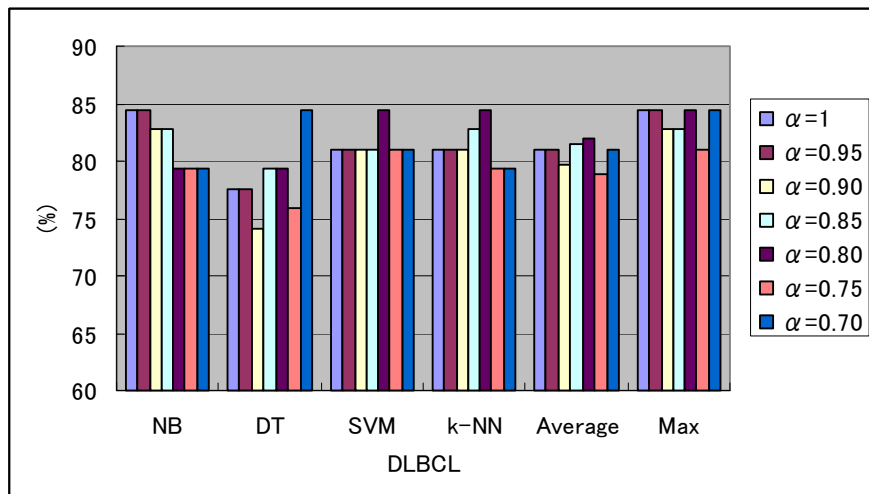

Fig. S10

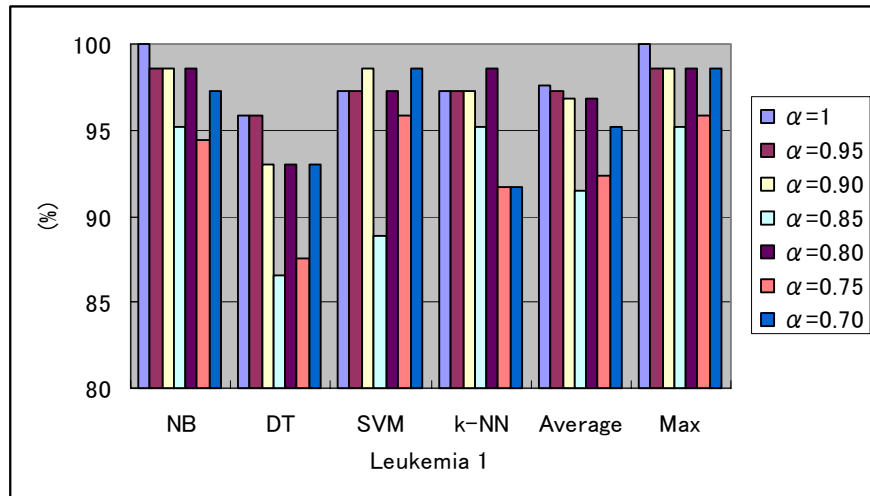

Fig. S11

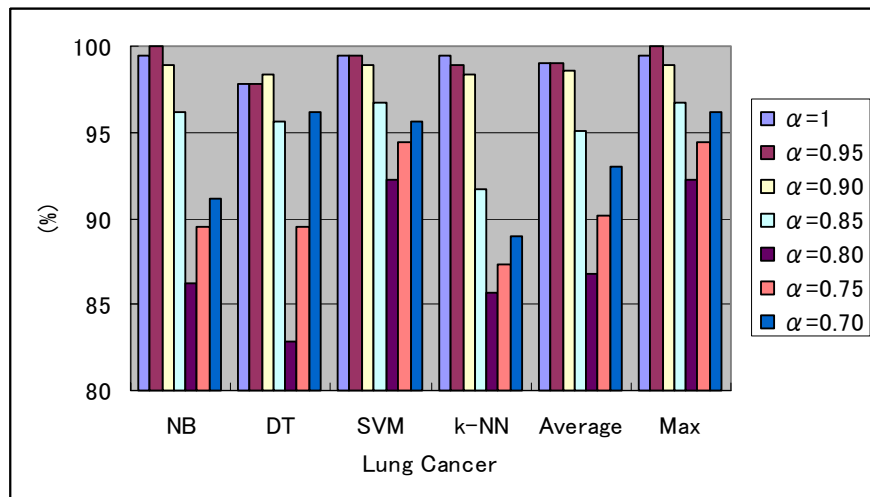

Fig. S12



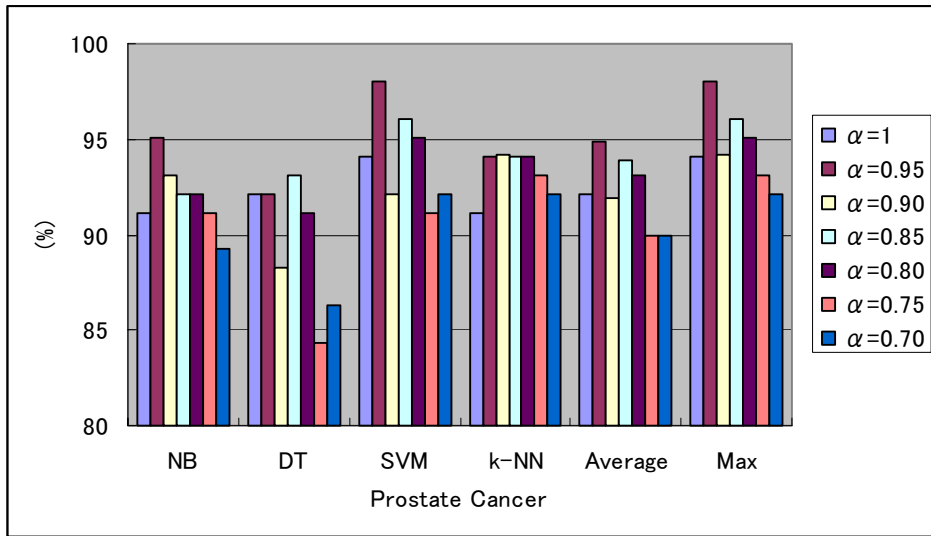

Fig. S13

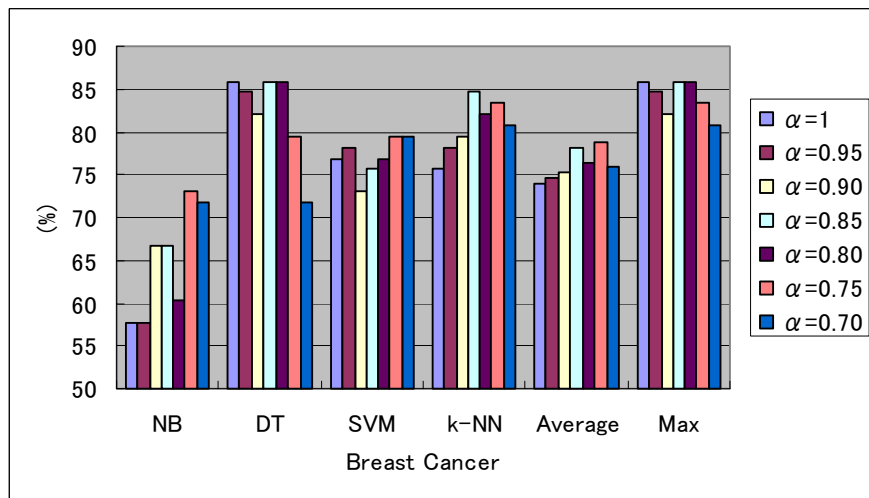

Fig. S14

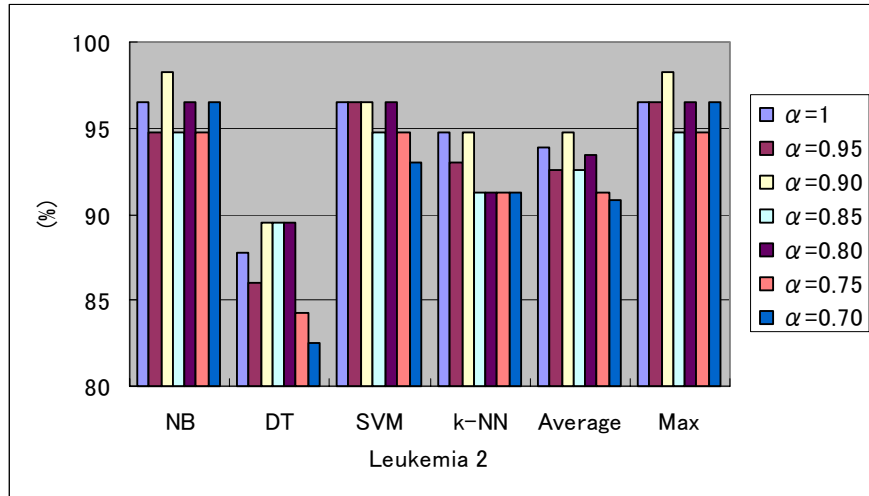

4 The co-ordinates graphs showing under different  $\alpha$  value, the average and best classification results using every classifier in the other seven datasets.

Fig. S15

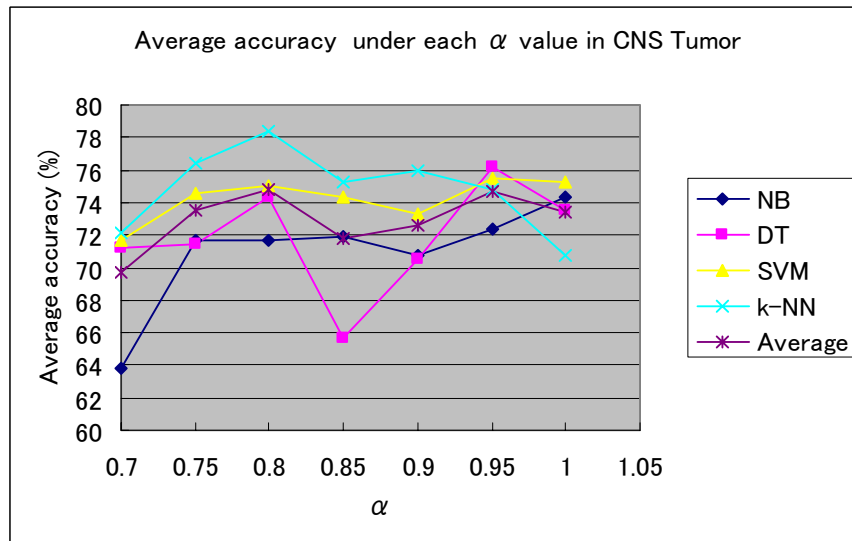

Fig. S16

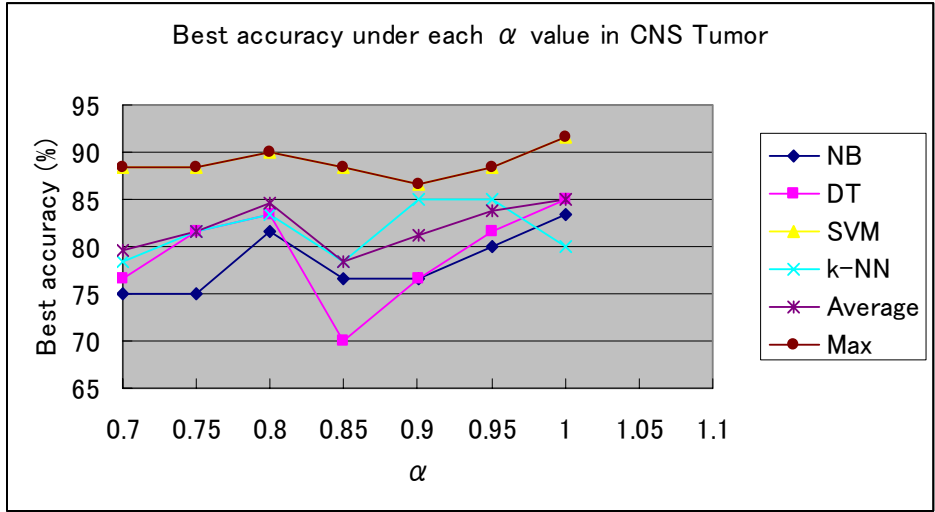

Fig. S17

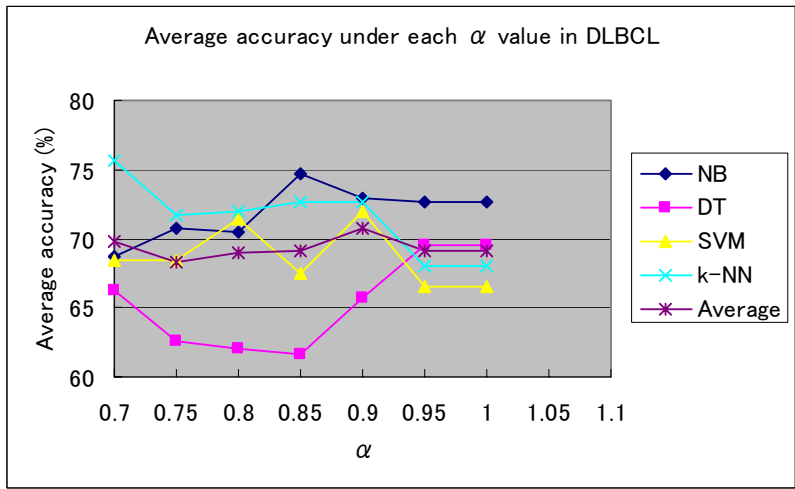

Fig. S18

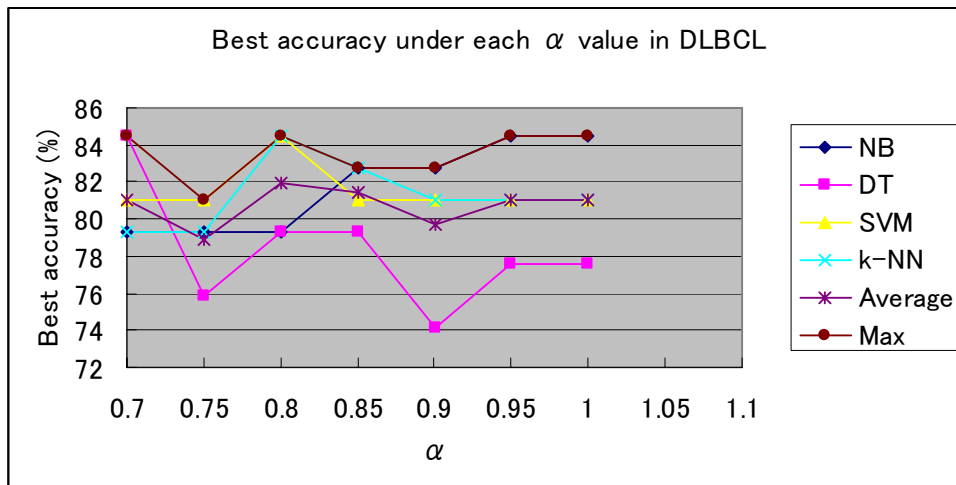

Fig. S19

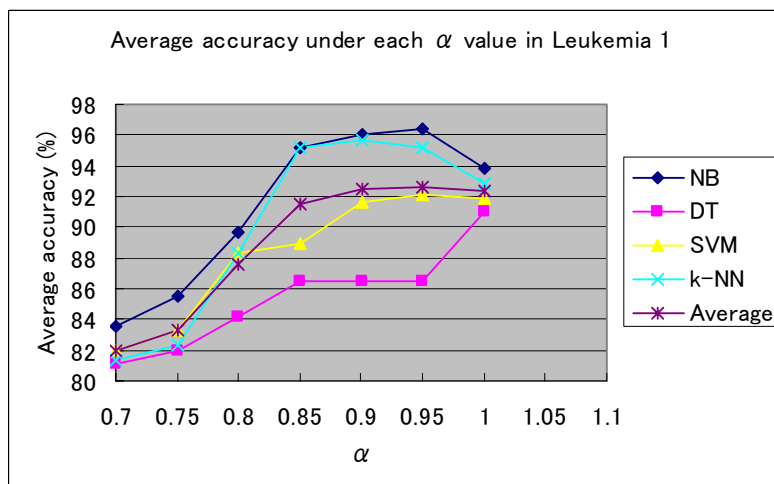

Fig. S20

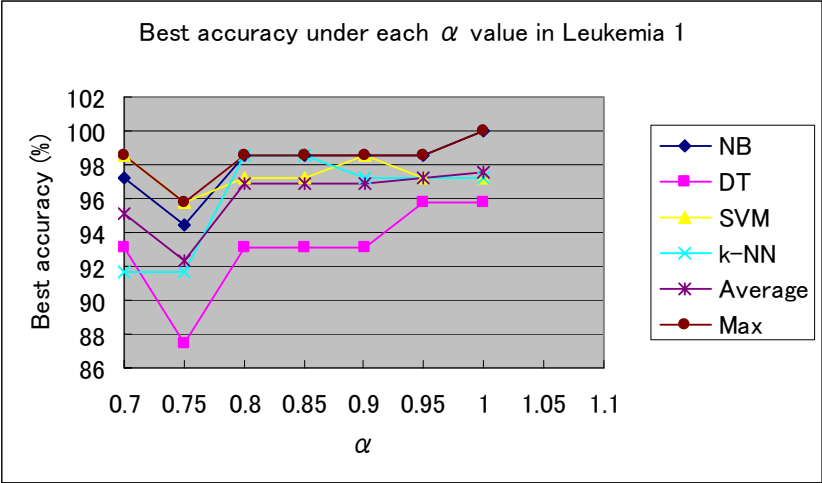

Fig. S21

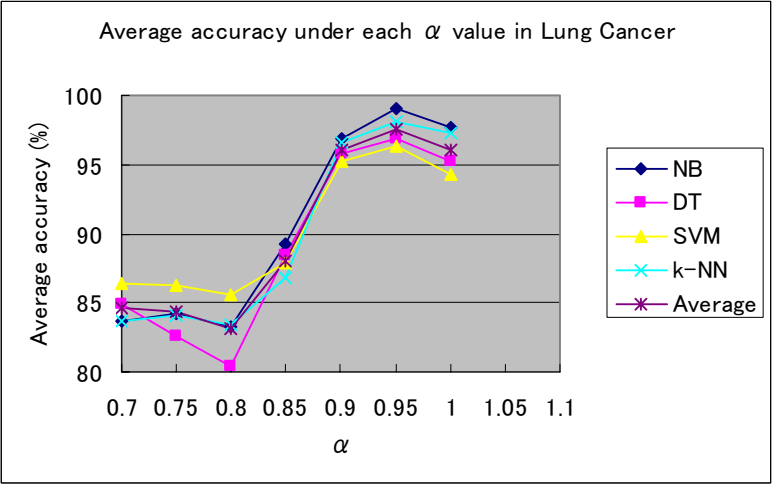

Fig. S22

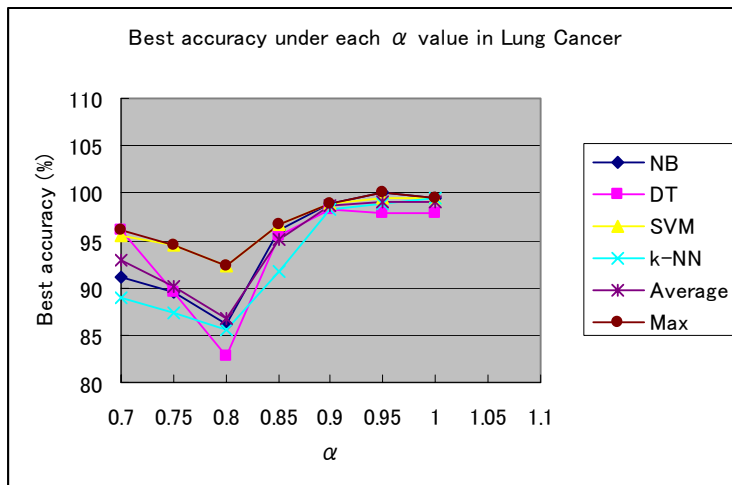

Fig. S23

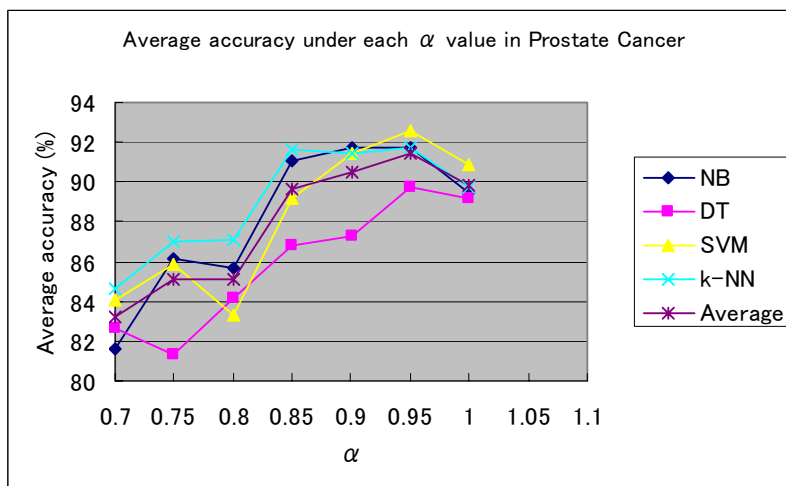

Fig. S24

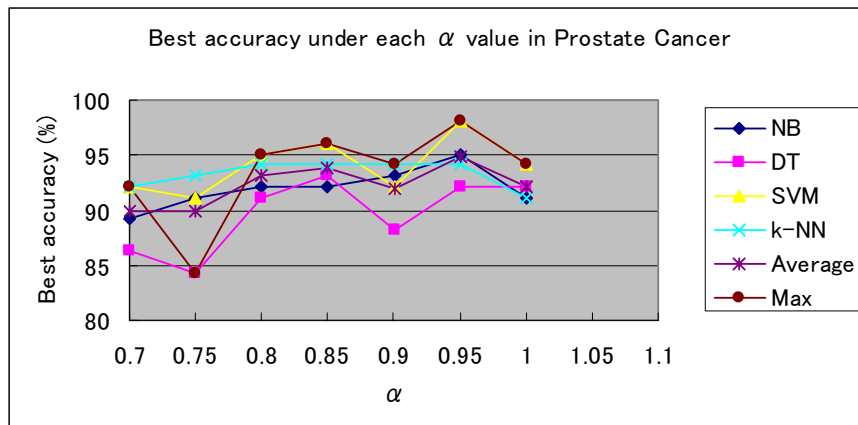

Fig. S25

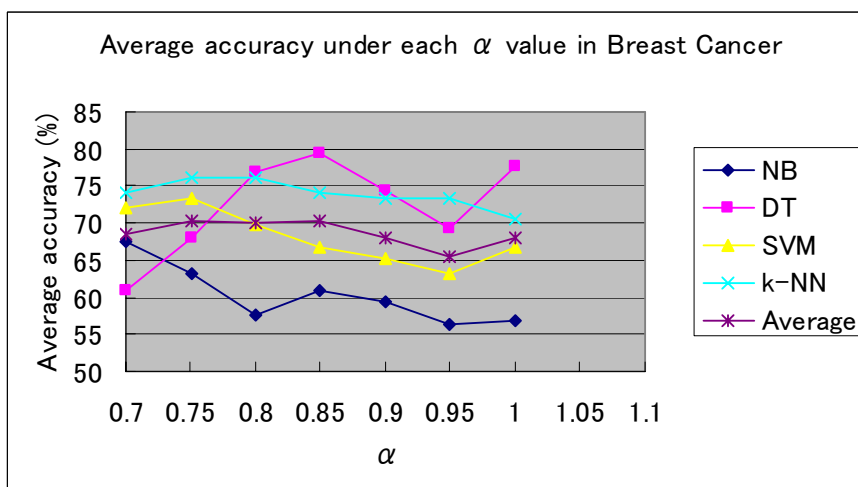

Fig. S26

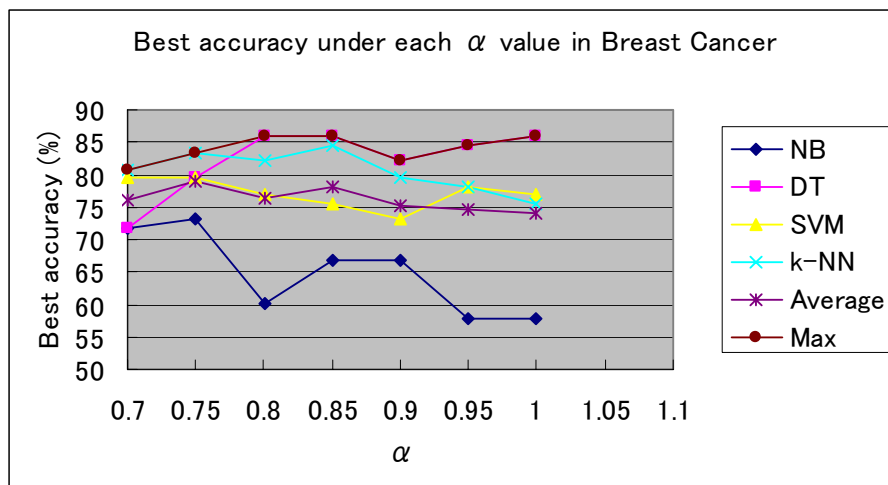

Fig. S27

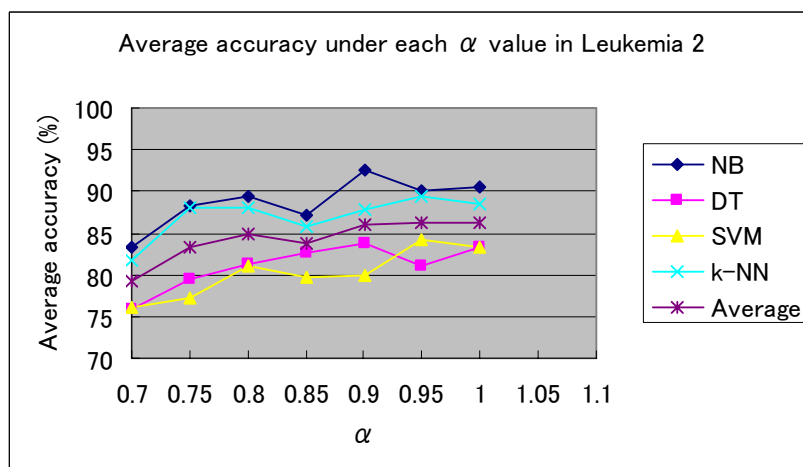

Fig. S28



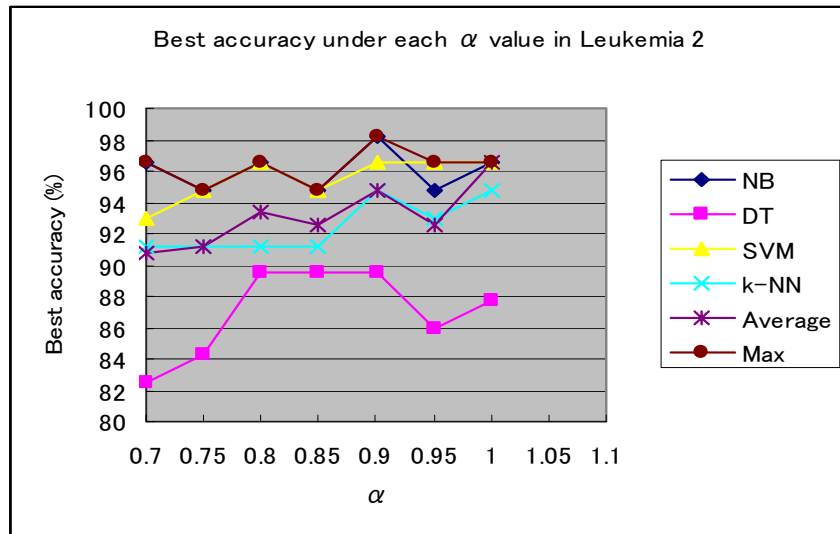

**5 Classification results in the other datasets based on the other feature selection methods.** (The best classification accuracy on each combination of feature selection methods and classifiers was formatted in boldface.)

**CNS Tumor:**

| Feature selection | Gene number | NB           | DT           | SVM          | k-NN         |
|-------------------|-------------|--------------|--------------|--------------|--------------|
| Chi               | 100         | 73.33        | 68.33        | <b>86.67</b> | 78.33        |
|                   | 50          | 71.67        | 78.33        | 80           | 76.67        |
|                   | 20          | <b>80</b>    | 78.33        | 71.67        | 73.33        |
|                   | 10          | 75           | 70           | 75           | 76.67        |
|                   | 5           | 65           | 75           | 61.67        | <b>80</b>    |
|                   | 2           | 48.33        | <b>81.67</b> | 65           | 78.33        |
|                   | 1           | 60           | 80           | 65           | 76.67        |
| Info              | 100         | 71.67        | 68.33        | <b>90</b>    | 80           |
|                   | 50          | 71.67        | 68.33        | 83.33        | 78.33        |
|                   | 20          | 78.33        | <b>81.67</b> | 78.33        | <b>83.33</b> |
|                   | 10          | <b>81.67</b> | 71.67        | 75           | 78.33        |
|                   | 5           | 76.67        | 71.67        | 63.33        | 78.33        |
|                   | 2           | 48.33        | <b>81.67</b> | 65           | 78.33        |
| RF                | 100         | 75           | 68.33        | <b>76.67</b> | <b>80</b>    |

|    |     |           |              |           |              |
|----|-----|-----------|--------------|-----------|--------------|
|    | 50  | 75        | 66.67        | 70        | 73.33        |
|    | 20  | 76.67     | 63.33        | 70        | <b>80</b>    |
|    | 10  | <b>80</b> | 76.67        | 73.33     | 71.67        |
|    | 5   | <b>80</b> | <b>78.33</b> | 70        | 73.33        |
|    | 2   | 71.67     | 38.33        | 66.67     | 63.33        |
|    | 1   | 70        | 38.33        | 60        | 60           |
| SU | 100 | 71.67     | 68.33        | <b>90</b> | 76.67        |
|    | 50  | 71.67     | 68.33        | 86.67     | 78.33        |
|    | 20  | 73.33     | 70           | 70        | 73.33        |
|    | 10  | <b>75</b> | 75           | 63.33     | 70           |
|    | 5   | 66.67     | 75           | 65        | 71.67        |
|    | 2   | 48.33     | <b>81.67</b> | 65        | 78.33        |
|    | 1   | 56.67     | <b>81.67</b> | 65        | <b>83.33</b> |

**DLBCL:**

| Feature selection | Gene number | NB           | DT           | SVM          | k-NN         |
|-------------------|-------------|--------------|--------------|--------------|--------------|
| Chi               | 100         | 74.14        | 51.72        | <b>75.86</b> | <b>77.59</b> |
|                   | 50          | <b>86.21</b> | 51.72        | <b>75.86</b> | 75.86        |
|                   | 20          | 77.59        | 56.90        | 67.24        | 74.14        |
|                   | 10          | 68.97        | 65.52        | 68.97        | 63.79        |
|                   | 5           | 74.14        | 68.97        | 55.17        | 70.69        |
|                   | 2           | 74.14        | 74.14        | 55.17        | 74.14        |
|                   | 1           | 67.24        | <b>79.31</b> | 55.17        | 70.69        |
| Info              | 100         | 74.14        | 51.72        | 74.14        | <b>77.59</b> |
|                   | 50          | <b>86.21</b> | 51.72        | <b>77.59</b> | <b>77.59</b> |
|                   | 20          | 82.76        | 55.17        | 67.24        | 67.24        |
|                   | 10          | 75.86        | 58.62        | 68.97        | 72.41        |
|                   | 5           | 81.03        | 63.79        | 68.97        | 74.14        |
|                   | 2           | 74.14        | <b>74.14</b> | 55.17        | 74.14        |
|                   | 1           | 70.69        | 70.69        | 55.17        | 75.86        |
| RF                | 100         | 77.59        | 51.72        | 77.59        | 81.03        |
|                   | 50          | <b>79.31</b> | 60.34        | 74.14        | 86.21        |
|                   | 20          | 77.59        | <b>74.14</b> | <b>79.31</b> | <b>87.93</b> |
|                   | 10          | 75.86        | 70.69        | 77.59        | 79.31        |

|    |     |              |              |              |              |
|----|-----|--------------|--------------|--------------|--------------|
|    | 5   | 74.14        | 68.97        | 70.69        | 79.31        |
|    | 2   | 70.69        | 65.52        | 75.86        | 74.14        |
|    | 1   | 68.97        | 68.97        | 53.45        | 65.52        |
| SU | 100 | 74.14        | 51.72        | 74.14        | 72.41        |
|    | 50  | <b>84.48</b> | 53.45        | <b>77.59</b> | <b>79.31</b> |
|    | 20  | <b>84.48</b> | 58.62        | 70.69        | 75.86        |
|    | 10  | 82.76        | 63.79        | 72.41        | 70.69        |
|    | 5   | 81.03        | 65.52        | 67.24        | 74.14        |
|    | 2   | 74.14        | 74.14        | 55.17        | 74.14        |
|    | 1   | 67.24        | <b>79.31</b> | 55.17        | 70.69        |

**Leukemia 1:**

| Feature selection | Gene number | NB           | DT           | SVM          | k-NN         |
|-------------------|-------------|--------------|--------------|--------------|--------------|
| Chi               | 100         | 95.83        | 83.33        | <b>97.22</b> | <b>97.22</b> |
|                   | 50          | 95.83        | 81.94        | <b>97.22</b> | <b>97.22</b> |
|                   | 20          | <b>97.22</b> | 81.94        | 94.44        | 93.06        |
|                   | 10          | 95.83        | 83.33        | 93.06        | 93.06        |
|                   | 5           | <b>97.22</b> | 84.72        | 94.44        | 94.44        |
|                   | 2           | 94.44        | <b>91.67</b> | 93.06        | 94.44        |
|                   | 1           | 91.67        | 90.28        | 79.17        | 91.67        |
| Info              | 100         | <b>95.83</b> | 80.56        | <b>97.22</b> | <b>97.22</b> |
|                   | 50          | <b>95.83</b> | 83.33        | <b>97.22</b> | 95.83        |
|                   | 20          | <b>95.83</b> | 81.94        | 94.44        | 94.44        |
|                   | 10          | 94.44        | 86.11        | 94.44        | 94.44        |
|                   | 5           | 93.06        | 87.5         | 93.06        | 94.44        |
|                   | 2           | 93.06        | <b>94.44</b> | 93.06        | 93.06        |
|                   | 1           | 88.89        | 91.67        | 88.89        | 90.28        |
| RF                | 100         | <b>95.83</b> | 79.17        | <b>97.22</b> | <b>94.44</b> |
|                   | 50          | <b>95.83</b> | 81.94        | <b>97.22</b> | <b>94.44</b> |
|                   | 20          | <b>95.83</b> | 86.11        | <b>97.22</b> | <b>94.44</b> |
|                   | 10          | <b>95.83</b> | 88.89        | 93.06        | 93.06        |
|                   | 5           | 94.44        | <b>94.44</b> | 91.67        | 93.06        |
|                   | 2           | 91.67        | 88.89        | 91.67        | 88.89        |
|                   | 1           | 88.89        | 91.67        | 88.89        | 90.28        |

|    |     |              |              |              |              |
|----|-----|--------------|--------------|--------------|--------------|
| SU | 100 | <b>95.83</b> | 79.17        | <b>97.22</b> | <b>97.22</b> |
|    | 50  | <b>95.83</b> | 83.33        | <b>97.22</b> | 95.83        |
|    | 20  | <b>95.83</b> | 81.94        | 95.83        | <b>97.22</b> |
|    | 10  | <b>95.83</b> | 83.33        | 93.06        | 93.06        |
|    | 5   | 94.44        | 87.5         | 94.44        | 94.44        |
|    | 2   | 94.44        | <b>91.67</b> | 93.06        | 94.44        |
|    | 1   | 91.67        | 90.28        | 79.17        | 91.67        |

### Lung Cancer:

| Feature selection | Gene number | NB           | DT           | SVM          | k-NN         |
|-------------------|-------------|--------------|--------------|--------------|--------------|
| Chi               | 100         | <b>100</b>   | 95.58        | <b>98.90</b> | <b>98.90</b> |
|                   | 50          | 99.45        | 96.69        | <b>98.90</b> | <b>98.90</b> |
|                   | 20          | 99.45        | 97.24        | <b>98.90</b> | <b>98.90</b> |
|                   | 10          | 99.45        | 97.24        | <b>98.90</b> | <b>98.90</b> |
|                   | 5           | 99.45        | 97.24        | 97.79        | 98.34        |
|                   | 2           | 97.24        | 97.24        | 95.58        | <b>98.90</b> |
|                   | 1           | 96.69        | <b>97.79</b> | 91.71        | 98.34        |
| Info              | 100         | <b>100</b>   | 96.69        | 98.90        | 98.90        |
|                   | 50          | <b>100</b>   | 97.24        | 98.90        | 98.90        |
|                   | 20          | <b>100</b>   | <b>97.79</b> | <b>99.45</b> | <b>99.45</b> |
|                   | 10          | 99.45        | <b>97.79</b> | 98.90        | 98.34        |
|                   | 5           | 98.90        | 97.24        | 98.90        | 98.90        |
|                   | 2           | 98.34        | 95.03        | 95.03        | 98.34        |
|                   | 1           | 96.69        | 94.48        | 92.82        | 95.03        |
| RF                | 100         | 97.24        | 97.79        | <b>98.90</b> | 97.79        |
|                   | 50          | 98.34        | 98.90        | <b>98.90</b> | 96.69        |
|                   | 20          | 98.34        | 98.34        | 98.34        | 97.24        |
|                   | 10          | <b>98.90</b> | 98.34        | 98.34        | 97.79        |
|                   | 5           | 97.79        | <b>99.45</b> | 98.34        | 98.90        |
|                   | 2           | 98.34        | 97.79        | 98.34        | <b>99.45</b> |
|                   | 1           | 96.13        | 97.24        | 95.58        | 97.24        |
| SU                | 100         | <b>100</b>   | 96.13        | <b>98.90</b> | <b>98.90</b> |
|                   | 50          | <b>100</b>   | 96.69        | <b>98.90</b> | <b>98.90</b> |
|                   | 20          | 99.45        | 97.24        | <b>98.90</b> | <b>98.90</b> |

|  |    |       |              |       |              |
|--|----|-------|--------------|-------|--------------|
|  | 10 | 99.45 | 97.24        | 98.34 | 98.34        |
|  | 5  | 99.45 | 97.24        | 97.79 | 97.79        |
|  | 2  | 97.24 | 97.24        | 95.58 | <b>98.90</b> |
|  | 1  | 97.79 | <b>97.79</b> | 92.82 | 97.24        |

**Prostate Cancer:**

| Feature selection | Gene number | NB           | DT           | SVM          | k-NN         |
|-------------------|-------------|--------------|--------------|--------------|--------------|
| Chi               | 100         | 91.18        | 85.29        | 94.12        | 91.18        |
|                   | 50          | <b>94.12</b> | 87.25        | <b>96.08</b> | 94.12        |
|                   | 20          | 93.14        | 88.24        | 95.10        | <b>95.10</b> |
|                   | 10          | 93.14        | 85.29        | <b>96.08</b> | 94.12        |
|                   | 5           | <b>94.12</b> | 87.25        | 93.14        | 93.14        |
|                   | 2           | 92.16        | <b>89.22</b> | 90.20        | 91.18        |
|                   | 1           | 84.31        | 88.24        | 82.35        | 87.25        |
| Info              | 100         | 91.18        | 87.25        | <b>95.10</b> | 93.14        |
|                   | 50          | <b>94.12</b> | <b>92.16</b> | <b>95.10</b> | 92.16        |
|                   | 20          | 93.14        | 90.20        | <b>95.10</b> | <b>96.08</b> |
|                   | 10          | <b>94.12</b> | 84.31        | <b>95.10</b> | 95.10        |
|                   | 5           | <b>94.12</b> | 87.25        | 93.14        | 93.14        |
|                   | 2           | 91.18        | 89.22        | 91.18        | 91.18        |
|                   | 1           | 84.31        | 88.24        | 82.35        | 87.25        |
| RF                | 100         | 94.12        | 89.22        | 93.14        | 94.12        |
|                   | 50          | <b>96.08</b> | 91.18        | 93.14        | 93.14        |
|                   | 20          | 93.14        | 85.29        | <b>94.12</b> | <b>95.10</b> |
|                   | 10          | 90.20        | <b>92.16</b> | 91.18        | 94.12        |
|                   | 5           | 89.22        | 87.25        | 91.18        | 91.18        |
|                   | 2           | 91.18        | 89.22        | 91.18        | 91.18        |
|                   | 1           | 84.31        | 88.24        | 82.35        | 87.25        |
| SU                | 100         | 92.16        | 87.25        | 93.14        | 94.12        |
|                   | 50          | 92.16        | 87.25        | 95.10        | 93.14        |
|                   | 20          | 93.14        | <b>91.18</b> | 94.12        | <b>95.10</b> |
|                   | 10          | <b>95.10</b> | 87.25        | <b>96.08</b> | 94.12        |
|                   | 5           | 94.12        | 90.20        | 93.14        | 92.16        |
|                   | 2           | 92.16        | 89.22        | 90.20        | 91.18        |

|  |   |       |       |       |       |
|--|---|-------|-------|-------|-------|
|  | 1 | 87.25 | 89.22 | 68.63 | 86.27 |
|--|---|-------|-------|-------|-------|

**Breast Cancer:**

| Feature selection | Gene number | NB           | DT           | SVM          | k-NN         |
|-------------------|-------------|--------------|--------------|--------------|--------------|
| Chi               | 100         | 57.69        | 74.36        | <b>88.46</b> | <b>80.77</b> |
|                   | 50          | 55.13        | 74.36        | 78.21        | 79.49        |
|                   | 20          | 53.85        | 66.67        | 70.51        | 75.64        |
|                   | 10          | 60.26        | 74.36        | 74.36        | 73.08        |
|                   | 5           | <b>61.54</b> | <b>76.92</b> | 64.10        | 76.92        |
|                   | 2           | 56.41        | 74.36        | 56.41        | 65.38        |
|                   | 1           | 56.41        | 42.31        | 57.69        | 78.21        |
| Info              | 100         | <b>57.69</b> | 61.54        | 76.92        | 76.92        |
|                   | 50          | 55.13        | 76.92        | <b>79.49</b> | <b>80.77</b> |
|                   | 20          | 55.13        | 70.51        | 70.51        | 78.21        |
|                   | 10          | <b>57.69</b> | <b>78.21</b> | 64.10        | 74.36        |
|                   | 5           | 56.41        | <b>78.21</b> | 56.41        | 74.36        |
|                   | 2           | 56.41        | 74.36        | 56.41        | 65.38        |
|                   | 1           | 56.41        | 74.36        | 57.69        | 78.21        |
| RF                | 100         | 78.21        | 61.54        | <b>83.33</b> | <b>88.46</b> |
|                   | 50          | <b>83.33</b> | <b>78.21</b> | 82.05        | <b>88.46</b> |
|                   | 20          | 74.36        | 65.38        | 76.92        | 76.92        |
|                   | 10          | 75.64        | 69.23        | 71.79        | 82.05        |
|                   | 5           | 73.08        | 71.79        | 73.08        | 67.95        |
|                   | 2           | 67.95        | 74.36        | 67.95        | 53.85        |
|                   | 1           | 69.23        | 74.36        | 58.97        | 62.82        |
| SU                | 100         | 55.13        | 61.54        | <b>83.33</b> | 78.21        |
|                   | 50          | 52.56        | 67.95        | <b>83.33</b> | <b>82.05</b> |
|                   | 20          | 58.97        | 78.21        | 73.08        | 73.08        |
|                   | 10          | <b>62.82</b> | <b>83.33</b> | 73.08        | 75.64        |
|                   | 5           | 60.26        | <b>83.33</b> | 69.23        | 75.64        |
|                   | 2           | 56.41        | 74.36        | 56.41        | 65.38        |
|                   | 1           | 56.41        | 42.31        | 57.69        | 78.21        |

**Leukemia 2:**

| Feature selection | Gene number | NB           | DT           | SVM          | k-NN         |
|-------------------|-------------|--------------|--------------|--------------|--------------|
| Chi               | 100         | 92.98        | 73.68        | 91.23        | 91.23        |
|                   | 50          | 94.74        | 84.21        | <b>94.74</b> | 91.23        |
|                   | 20          | <b>96.49</b> | 80.70        | 92.98        | 91.23        |
|                   | 10          | <b>96.49</b> | 84.21        | 87.72        | 91.23        |
|                   | 5           | 94.74        | <b>89.47</b> | 70.18        | <b>94.74</b> |
|                   | 2           | 84.21        | 87.72        | 64.91        | 84.21        |
|                   | 1           | 85.96        | <b>89.47</b> | 52.63        | 85.96        |
|                   | Info        | 100          | 92.98        | 85.96        | <b>94.74</b> |
| 50                |             | 94.74        | 82.46        | 92.98        | 89.47        |
| 20                |             | <b>96.49</b> | 80.70        | <b>94.74</b> | 92.98        |
| 10                |             | 94.74        | 84.21        | 91.23        | 91.23        |
| 5                 |             | 94.74        | 89.47        | 70.18        | <b>94.74</b> |
| 2                 |             | 85.96        | <b>91.23</b> | 70.18        | 91.23        |
| 1                 |             | 85.96        | 89.47        | 52.63        | 85.96        |
| RF                |             | 100          | 94.74        | 84.21        | 92.98        |
|                   | 50          | <b>96.49</b> | 87.72        | <b>96.49</b> | <b>94.74</b> |
|                   | 20          | 94.74        | 89.47        | 91.23        | 91.23        |
|                   | 10          | 91.23        | <b>91.23</b> | 91.23        | 91.23        |
|                   | 5           | 87.72        | 80.70        | 89.47        | 91.23        |
|                   | 2           | 85.96        | 82.46        | 82.46        | 84.21        |
|                   | 1           | 71.93        | 84.21        | 70.18        | 82.46        |
|                   | SU          | 100          | 92.98        | 80.70        | <b>98.25</b> |
| 50                |             | 92.98        | 84.21        | 96.49        | 92.98        |
| 20                |             | <b>94.74</b> | 85.96        | 94.74        | 92.98        |
| 10                |             | 92.98        | 89.47        | 85.96        | 92.98        |
| 5                 |             | <b>94.74</b> | <b>91.23</b> | 70.18        | <b>96.49</b> |
| 2                 |             | 85.96        | <b>91.23</b> | 70.18        | 91.23        |
| 1                 |             | 85.96        | 89.47        | 52.63        | 85.96        |
